# Supplementary material for: Thoracic Endovascular Aortic Repair in a Patient with Mobile Aortic Thrombosis
Source: Case Rep Vasc Med. 2014 Feb 6;2014:302346. doi: 10.1155/2014/302346 (PMC3971888; doi:10.1155/2014/302346)
Supplement: Supplementary file 1 — Video 1: 2D TEE X-plane imaging demonstrating the mobile thrombi with no evidence of a dissection or overt atheromatous plagues. Video 2: 3D TEE showing the mobile pedunculated thrombus at its attachment point to the aortic wall with no surrounding aortic atheroma or dissection visable in the proximal descending aorta. Video 3: 3D TEE demonstrating three mobile discrete thrombi at the same level distal to the attachment point of the large pedunculated thrombus. The distal end of the latter thrombus is the large moble thrombus at approximately 10 ‘0 clock which can be seen to track up the aorta. [file 302346.f1.zip]

Archive with 3 entries (3 files):
- 775517.avi
- 775518.avi
- mat.302346.v1.avi
